# Supplementary material for: Assessment of the Concentration of 51 Elements in the Liver and in Various Parts of the Human Brain—Profiling of the Mineral Status
Source: MDPI journal article supplement (doi:10.3390/nu15122799), 2023-06-19
Supplement: s1 [file s1]

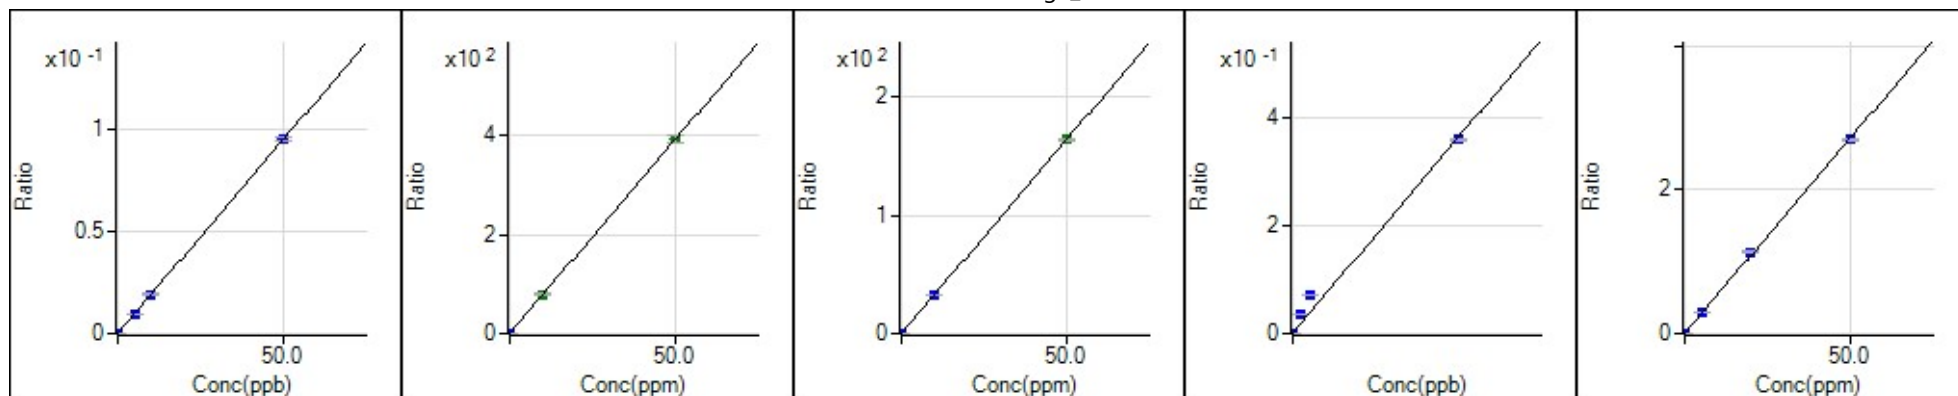

9 Be [ No Gas ]

ISTD: 45 Sc

$$y = 1.903E-3 x + 7.566E-6$$

R 1.0000

DL 0.002121

BEC 0.003976

23 Na [ He ]

ISTD: 45 Sc

$$y = 7.852E0 x + 3.478E-1$$

R 1.0000

DL 0.003985

BEC 0.0443

24 Mg [ He ]

ISTD: 45 Sc

$$y = 3.280E0 x + 4.907E-3$$

R 1.0000

DL 0.0008205

BEC 0.001496

27 Al [ He ]

ISTD: 45 Sc

$$y = 3.626E-4 x + 1.012E-3$$

R 0.9957

DL 1.197

BEC 2.791

31 P [ He ]

ISTD: 45 Sc

$$y = 5.440E-2 x + 1.812E-3$$

R 0.9998

DL 0.01034

BEC 0.03331

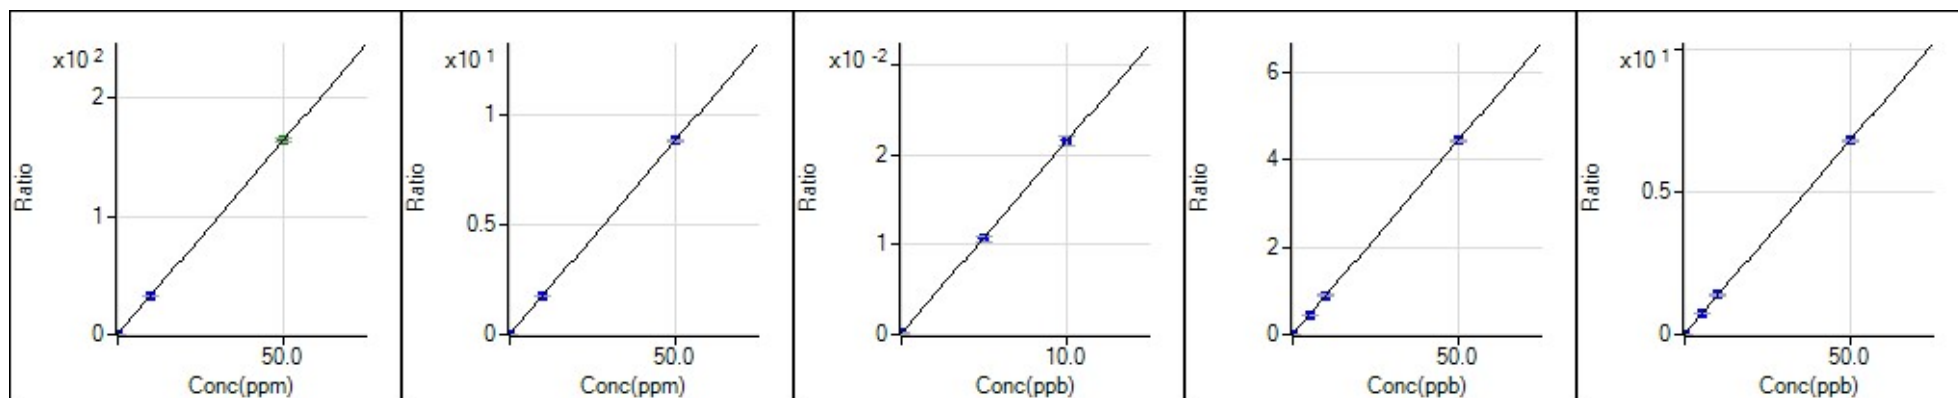

39 K [ He ]

ISTD: 45 Sc

$$y = 3.274E0 x + 3.792E-1$$

R 1.0000

DL 0.006145

BEC 0.1158

44 Ca [ He ]

ISTD: 45 Sc

$$y = 1.768E-1 x + 3.701E-3$$

R 1.0000

DL 0.003611

BEC 0.02094

47 Ti [ He ]

ISTD: 45 Sc

$$y = 2.134E-3 x + 1.285E-4$$

R 1.0000

DL 0.0803

BEC 0.06021

51 V [ He ]

ISTD: 45 Sc

$$y = 8.886E-2 x + 3.030E-4$$

R 1.0000

DL 0.006835

BEC 0.003409

52 Cr [ He ]

ISTD: 45 Sc

$$y = 1.356E-1 x + 1.397E-2$$

R 1.0000

DL 0.03834

BEC 0.103

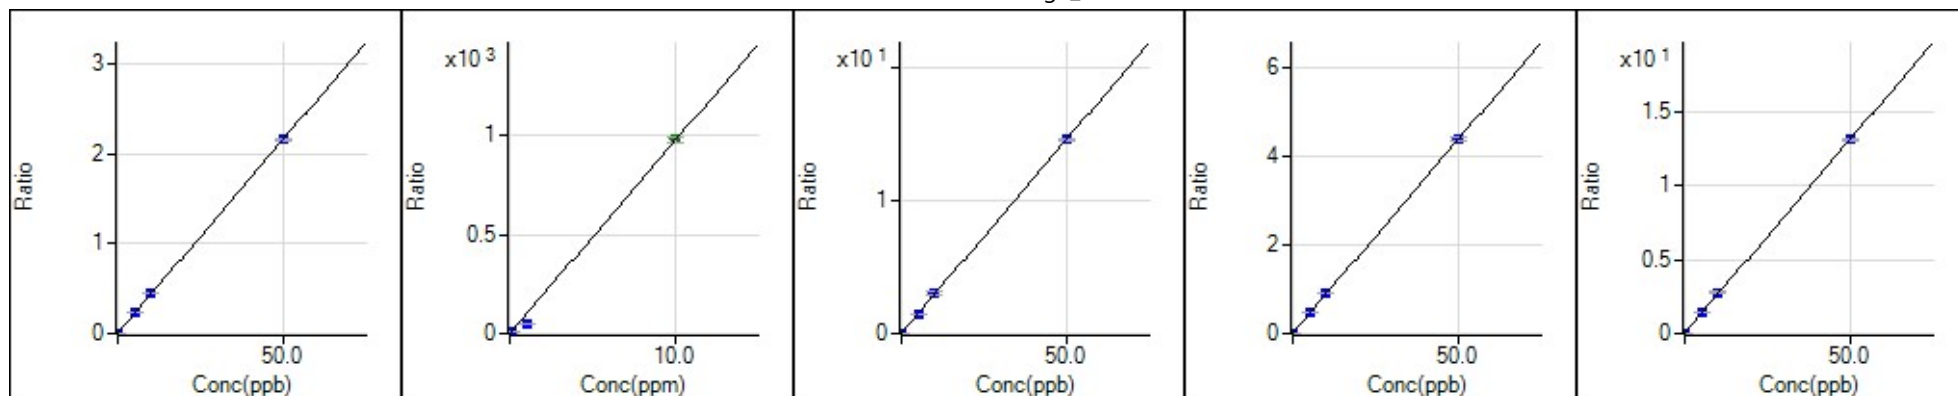

55 Mn [ He ]

ISTD: 45 Sc

$$y = 4.325E-2 x + 2.696E-3$$

R 1.0000

DL 0.04479

BEC 0.06233

56 Fe [ He ]

ISTD: 45 Sc

$$y = 9.766E1 x + 1.412E-1$$

R 0.9988

DL 3.084E-05

BEC 0.001446

59 Co [ He ]

ISTD: 45 Sc

$$y = 2.925E-1 x + 2.537E-2$$

R 1.0000

DL 0.44

BEC 0.08674

60 Ni [ He ]

ISTD: 45 Sc

$$y = 8.748E-2 x + 7.732E-3$$

R 1.0000

DL 0.03112

BEC 0.08839

63 Cu [ He ]

ISTD: 45 Sc

$$y = 2.618E-1 x + 3.231E-2$$

R 0.9999

DL 0.02875

BEC 0.1234

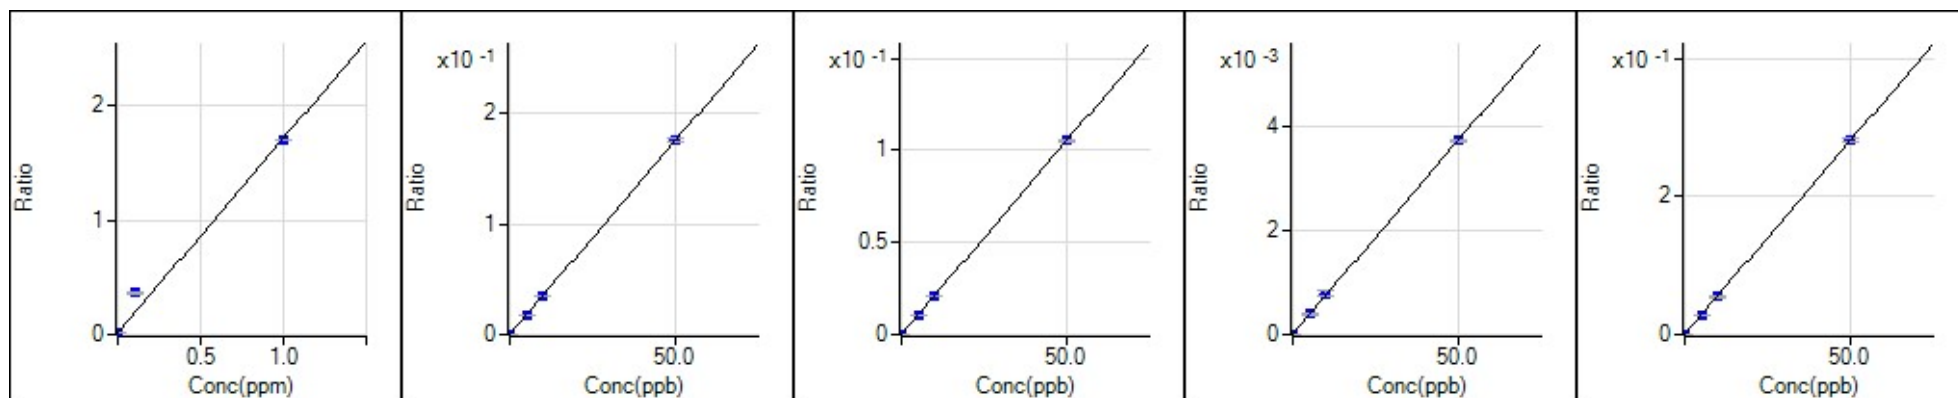

66 Zn [ He ]

ISTD: 89 Y

$$y = 1.702E0 x + 1.296E-2$$

R 0.9942

DL 0.0009462

BEC 0.007612

71 Ga [ He ]

ISTD: 89 Y

$$y = 3.510E-3 x + 4.641E-5$$

R 1.0000

DL 0.03435

BEC 0.01322

75 As [ He ]

ISTD: 89 Y

$$y = 2.105E-3 x + 3.583E-5$$

R 1.0000

DL 0.005685

BEC 0.01702

78 Se [ He ]

ISTD: 89 Y

$$y = 7.443E-5 x + 6.942E-6$$

R 1.0000

DL 0.1411

BEC 0.09326

85 Rb [ He ]

ISTD: 89 Y

$$y = 5.610E-3 x + 3.120E-4$$

R 1.0000

DL 0.04905

BEC 0.05562

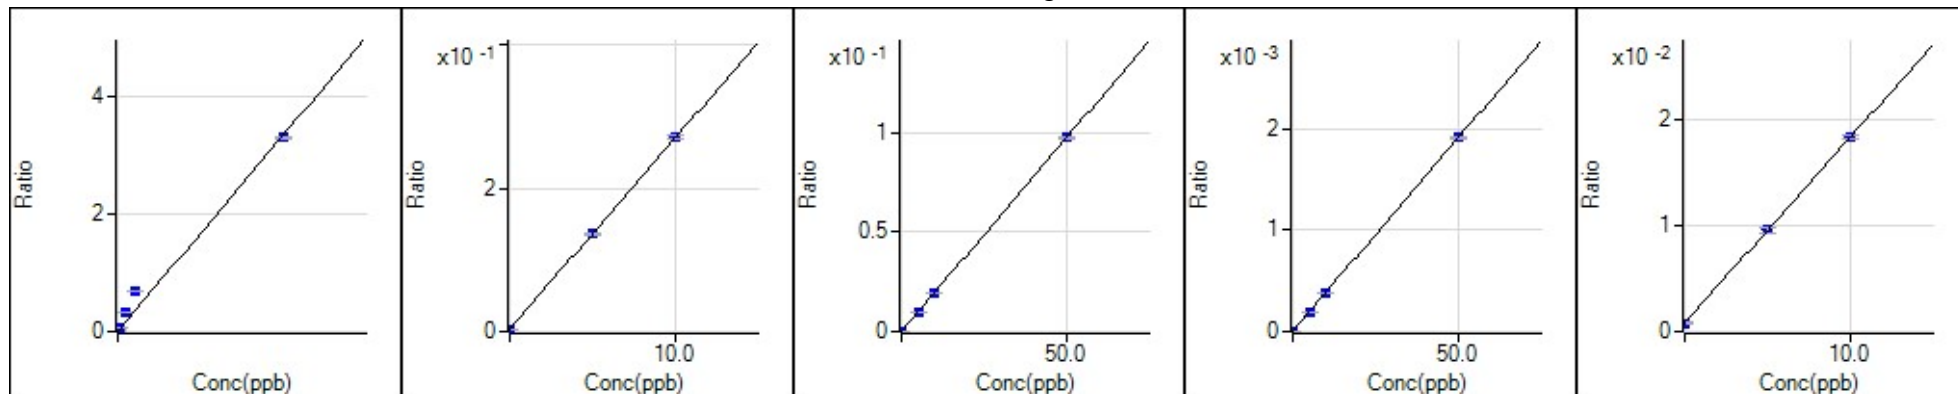

88 Sr [ He ]

ISTD: 89 Y

$$y = 3.339E-3 x + 1.965E-3$$

R 0.9941

DL 0.0471

BEC 0.5885

90 Zr [ He ]

ISTD: 89 Y

$$y = 2.668E-2 x + 3.282E-3$$

R 1.0000

DL 0.01889

BEC 0.123

75 -&gt; 91 As [ O2 ]

ISTD: 89 -&gt; 105 Y

$$y = 1.951E-3 x + 4.062E-5$$

R 1.0000

DL 0.003771

BEC 0.02082

78 -&gt; 94 Se [ O2 ]

ISTD: 89 -&gt; 105 Y

$$y = 3.816E-5 x + 4.803E-6$$

R 1.0000

DL 0.08514

BEC 0.1259

95 Mo [ He ]

ISTD: 89 Y

$$y = 1.754E-3 x + 8.165E-4$$

R 1.0000

DL 0.1182

BEC 0.4656

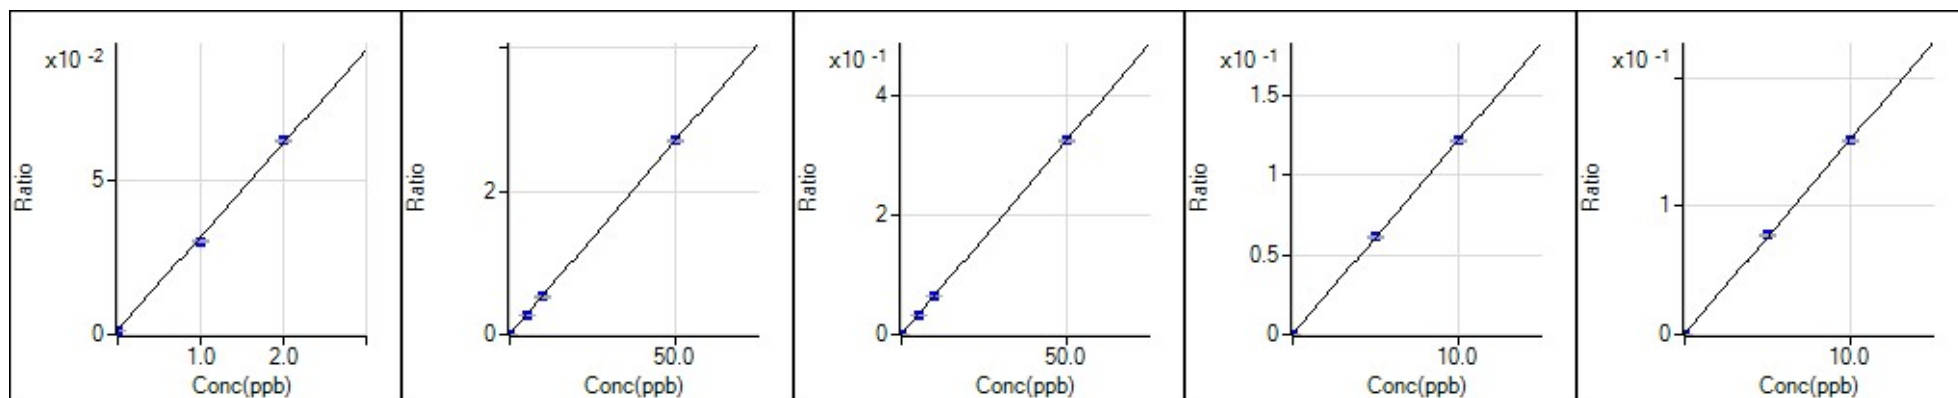

105 Pd [ He ]

ISTD: 89 Y

$$y = 3.010E-2 x + 1.510E-3$$

R 0.9991

DL 0.007312

BEC 0.05016

107 Ag [ He ]

ISTD: 89 Y

$$y = 5.415E-2 x + 6.548E-4$$

R 1.0000

DL 0.006478

BEC 0.01209

111 Cd [ He ]

ISTD: 89 Y

$$y = 6.493E-3 x + 1.037E-5$$

R 1.0000

DL 0.003168

BEC 0.001597

118 Sn [ He ]

ISTD: 89 Y

$$y = 1.218E-2 x + 1.003E-4$$

R 1.0000

DL 0.007261

BEC 0.008234

121 Sb [ He ]

ISTD: 89 Y

$$y = 1.516E-2 x + 3.546E-4$$

R 0.9999

DL 0.01288

BEC 0.0234

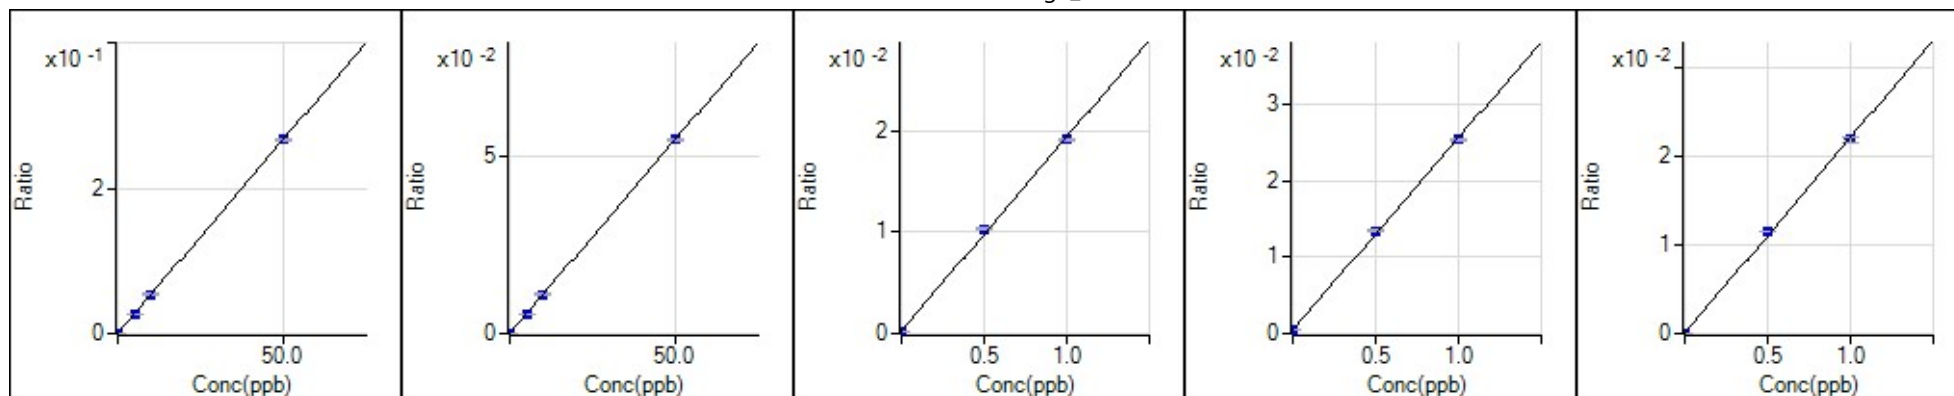

|                            |                            |                            |                            |                            |
|----------------------------|----------------------------|----------------------------|----------------------------|----------------------------|
| 133 Cs [ He ]              | 137 Ba [ He ]              | 139 La [ He ]              | 140 Ce [ He ]              | 141 Pr [ He ]              |
| ISTD: 175 Lu               |
| $y = 5.351E-3x + 4.032E-5$ | $y = 1.098E-3x + 1.597E-5$ | $y = 1.913E-2x + 2.496E-4$ | $y = 2.518E-2x + 4.578E-4$ | $y = 2.202E-2x + 2.815E-5$ |
| R 1.0000                   | R 1.0000                   | R 0.9993                   | R 0.9997                   | R 0.9996                   |
| DL 0.005469                | DL 0.02366                 | DL 0.004986                | DL 0.004723                | DL 0.001025                |
| BEC 0.007535               | BEC 0.01455                | BEC 0.01305                | BEC 0.01818                | BEC 0.001278               |

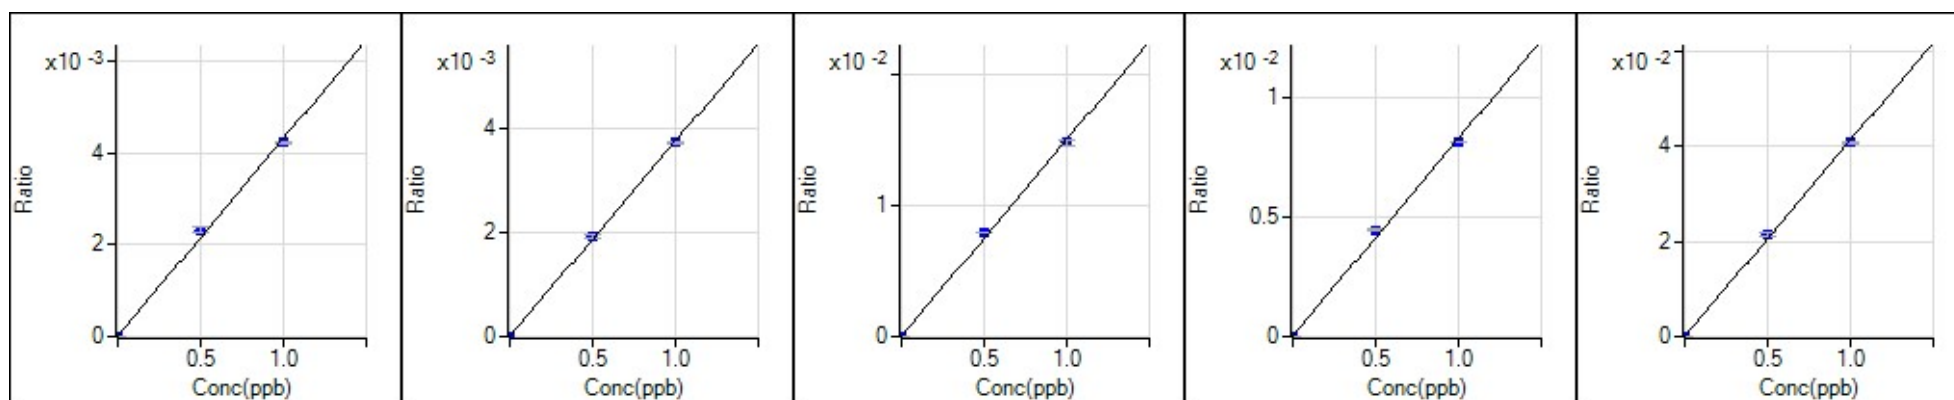

|                            |                 |                            |                            |                            |
|----------------------------|-----------------|----------------------------|----------------------------|----------------------------|
| 146 Nd [ He ]              | 147 Sm [ He ]   | 153 Eu [ He ]              | 157 Gd [ He ]              | 159 Tb [ He ]              |
| ISTD: 175 Lu               | ISTD: 175 Lu    | ISTD: 175 Lu               | ISTD: 175 Lu               | ISTD: 175 Lu               |
| $y = 4.310E-3x + 6.569E-6$ | $y = 3.740E-3x$ | $y = 1.501E-2x + 8.437E-6$ | $y = 8.280E-3x + 1.126E-5$ | $y = 4.124E-2x + 1.969E-5$ |
| R 0.9983                   | R 0.9998        | R 0.9991                   | R 0.9984                   | R 0.9995                   |
| DL 0.001134                | DL 0            | DL 0.0005568               | DL 0.002048                | DL 0.000351                |
| BEC 0.001524               | BEC 0           | BEC 0.0005622              | BEC 0.00136                | BEC 0.0004775              |

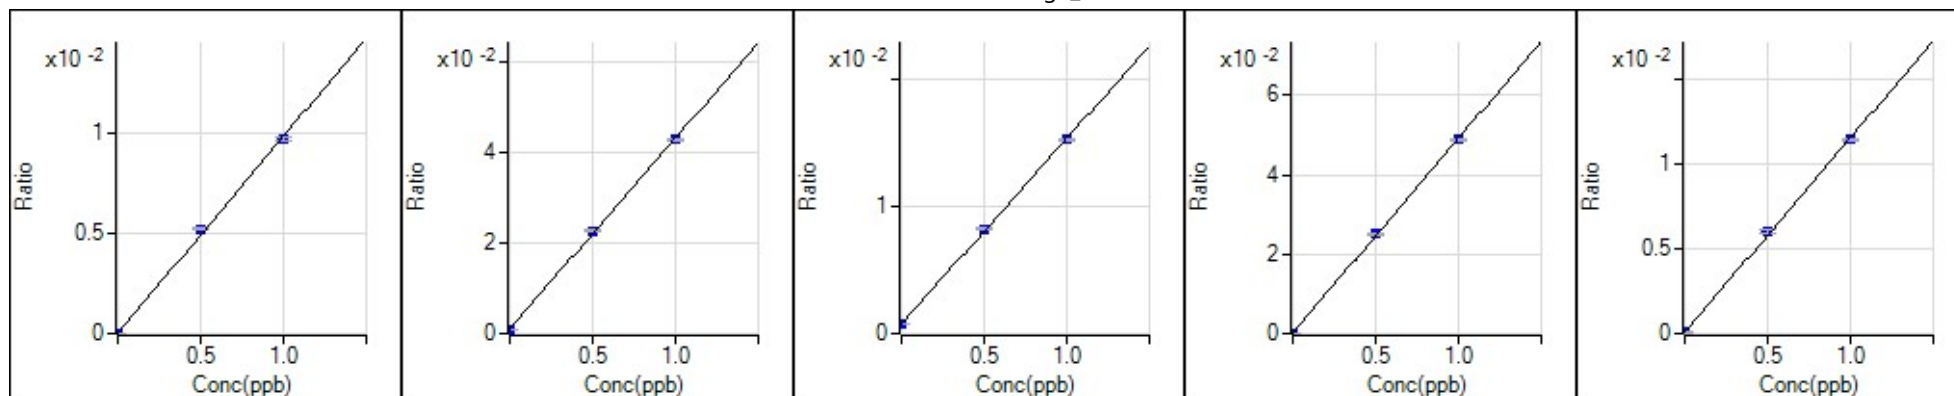

163 Dy [ He ]

ISTD: 175 Lu

$$y = 9.799\text{E-}3 x + 5.609\text{E-}6$$

R 0.9990

DL 0.00227

BEC 0.0005724

165 Ho [ He ]

ISTD: 175 Lu

$$y = 4.221\text{E-}2 x + 1.027\text{E-}3$$

R 0.9998

DL 0.003011

BEC 0.02434

166 Er [ He ]

ISTD: 175 Lu

$$y = 1.462\text{E-}2 x + 7.522\text{E-}4$$

R 0.9999

DL 0.01275

BEC 0.05146

169 Tm [ He ]

ISTD: 175 Lu

$$y = 4.901\text{E-}2 x + 1.238\text{E-}4$$

R 0.9999

DL 0.001196

BEC 0.002526

172 Yb [ He ]

ISTD: 175 Lu

$$y = 1.148\text{E-}2 x + 6.382\text{E-}5$$

R 0.9997

DL 0.004725

BEC 0.005557

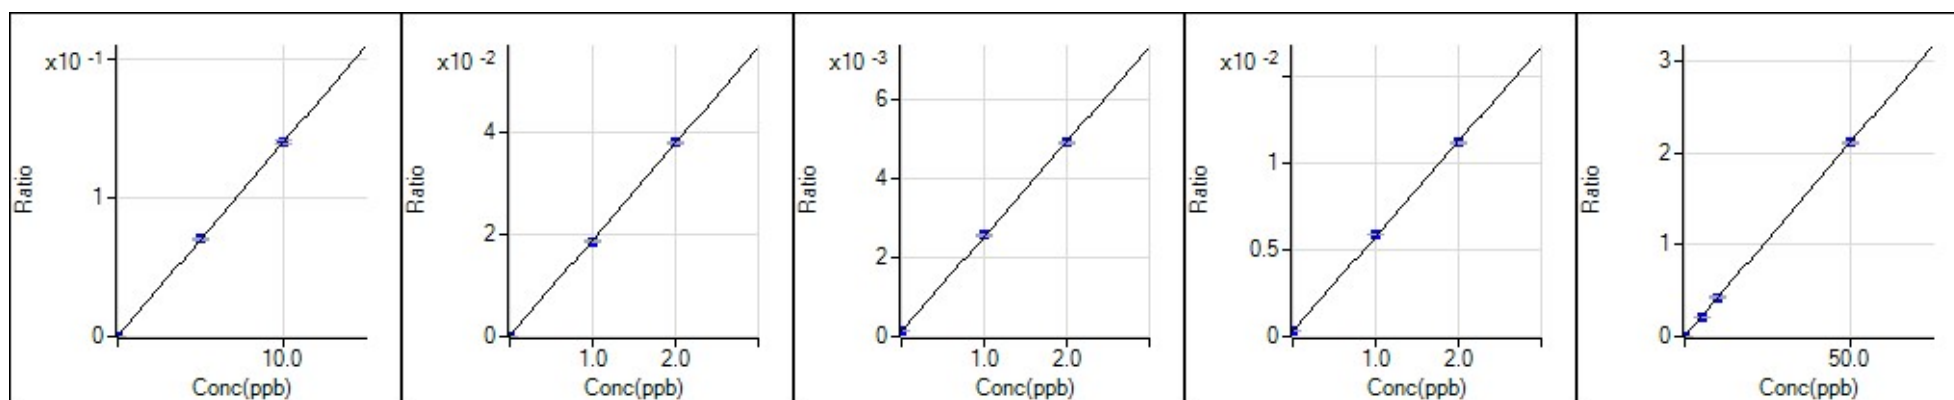

178 Hf [ He ]

ISTD: 175 Lu

$$y = 1.395\text{E-}2 x + 1.135\text{E-}4$$

R 1.0000

DL 0.005351

BEC 0.008141

195 Pt [ He ]

ISTD: 175 Lu

$$y = 1.882\text{E-}2 x + 1.030\text{E-}4$$

R 0.9999

DL 0.001916

BEC 0.005473

201 Hg [ He ]

ISTD: 175 Lu

$$y = 2.392\text{E-}3 x + 1.314\text{E-}4$$

R 0.9999

DL 0.01189

BEC 0.05493

202 Hg [ He ]

ISTD: 175 Lu

$$y = 5.492\text{E-}3 x + 3.021\text{E-}4$$

R 0.9999

DL 0.01373

BEC 0.05501

205 Tl [ He ]

ISTD: 175 Lu

$$y = 4.237\text{E-}2 x + 1.232\text{E-}4$$

R 1.0000

DL 0.0007525

BEC 0.002908

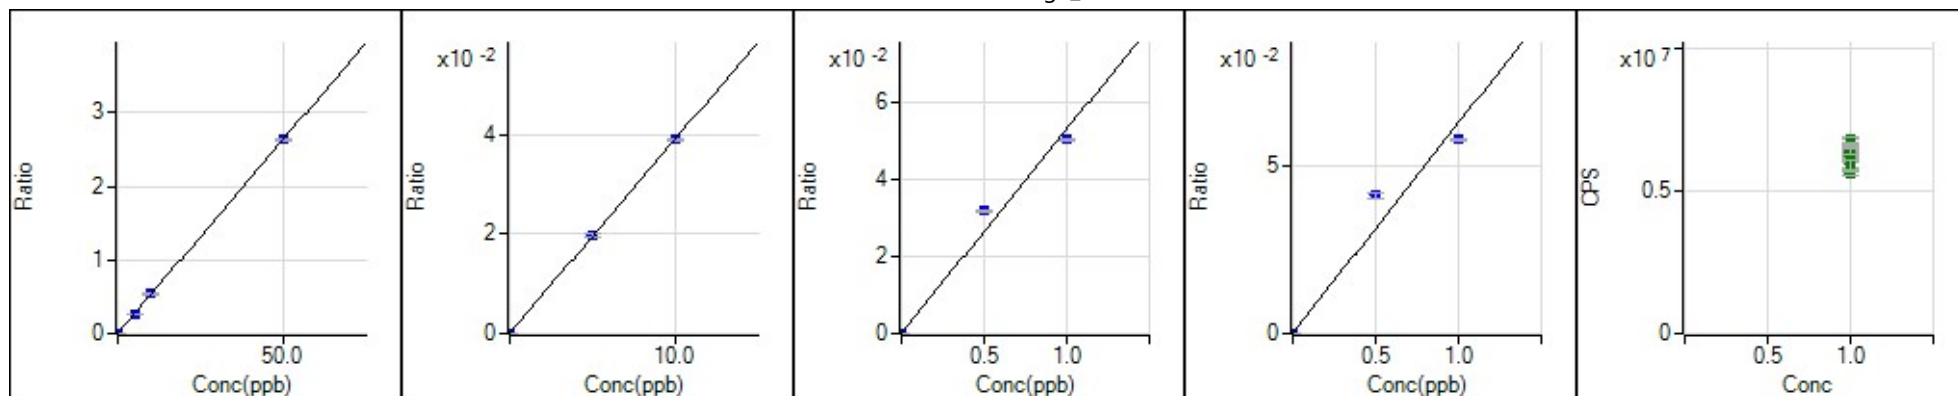

208 Pb [ He ]

ISTD: 175 Lu

 $y = 5.275E-2 x + 1.174E-3$ 

R 1.0000

DL 0.003969

BEC 0.02227

209 Bi [ He ]

ISTD: 175 Lu

 $y = 3.911E-3 x + 4.783E-5$ 

R 1.0000

DL 0.007456

BEC 0.01223

232 Th [ He ]

ISTD: 175 Lu

 $y = 5.299E-2 x + 6.187E-5$ 

R 0.9888

DL 0.0008135

BEC 0.001168

238 U [ He ]

ISTD: 175 Lu

 $y = 6.295E-2 x + 4.595E-5$ 

R 0.9715

DL 0.0004065

BEC 0.0007299

45 Sc [ No Gas ]

ISTD: ---

Excluded

R

DL

BEC

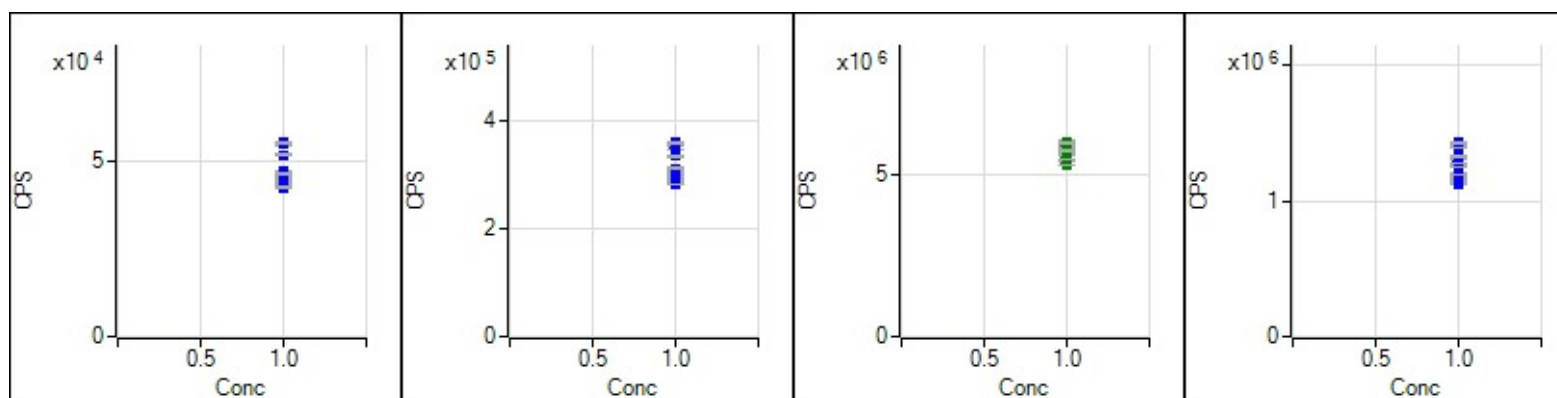

45 Sc [ He ]

ISTD: ---

Excluded

R

DL

BEC

89 Y [ He ]

ISTD: ---

Excluded

R

DL

BEC

89 -&gt; 105 Y [ O2 ]

ISTD: ---

Excluded

R

DL

BEC

175 Lu [ He ]

ISTD: ---

Excluded

R

DL

BEC
