# Supplementary figures and images for: Assessment of the Concentration of 51 Elements in the Liver and in Various Parts of the Human Brain—Profiling of the Mineral Status
Source: MDPI journal article supplement (doi:10.3390/nu15122799), 2023-06-19

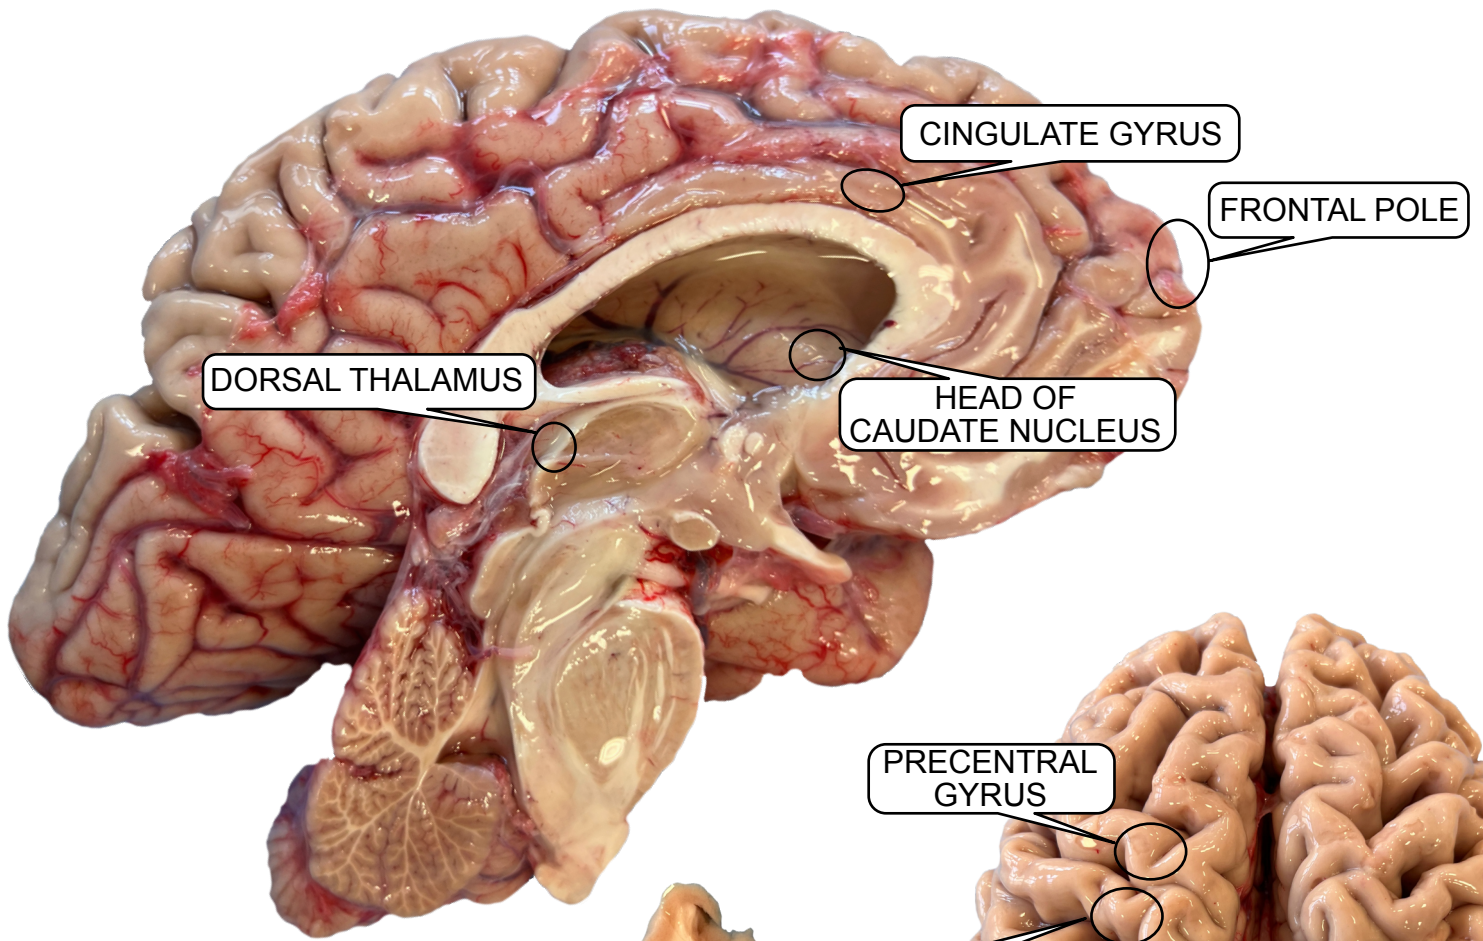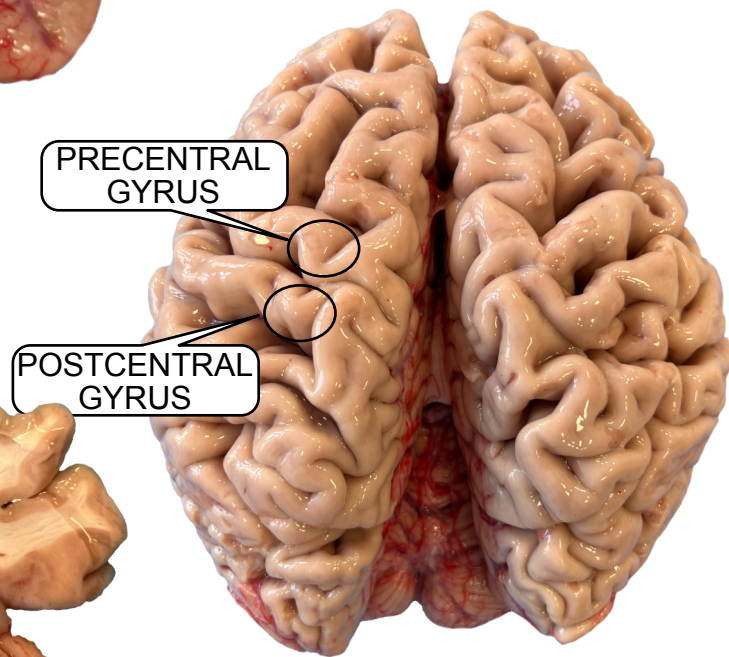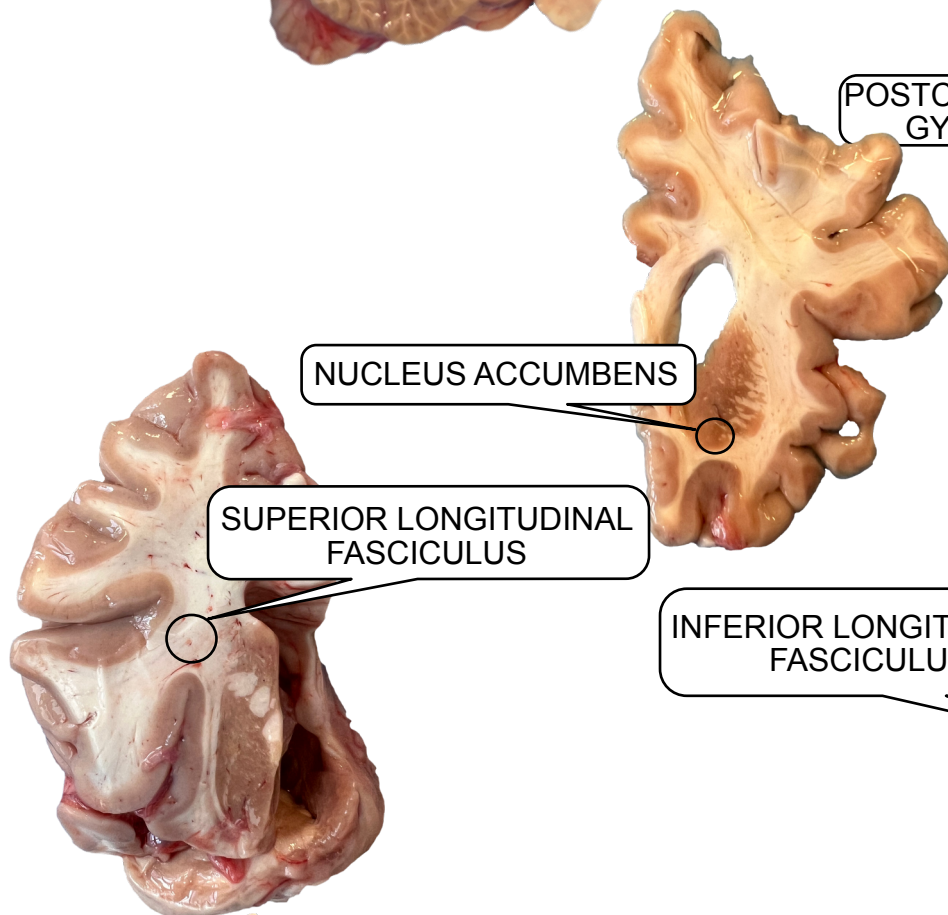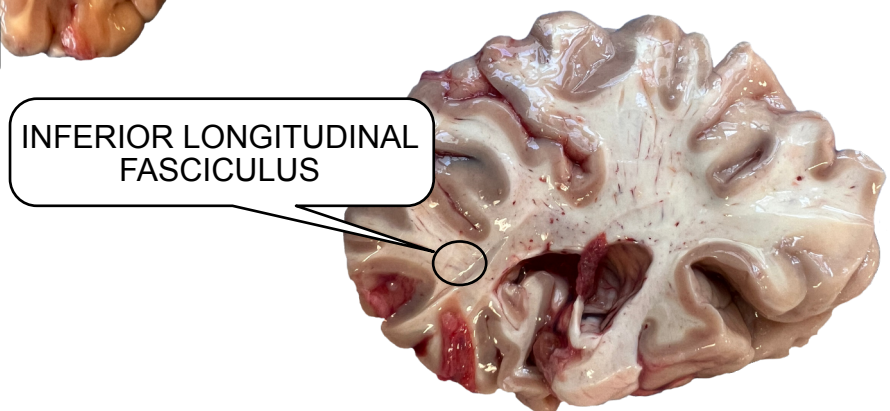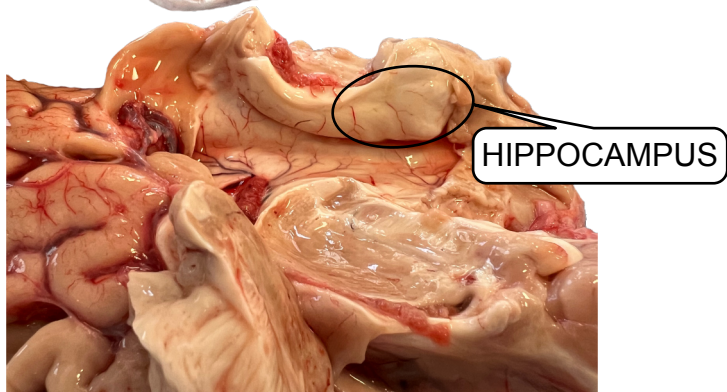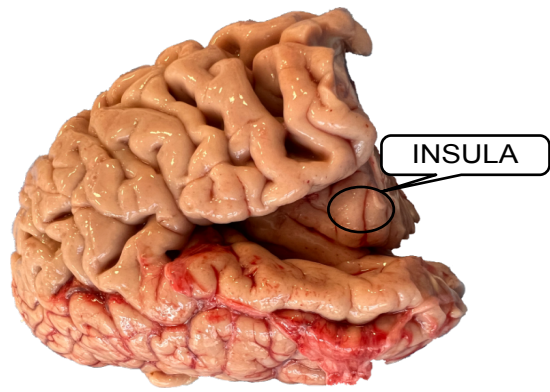

Supplement: s1 [file s1]
